# Supplementary material for: From Infection to Immunity: Understanding the Response to SARS-CoV2 Through In-Silico Modeling
Source: PubMed Central journal article supplement (PMC8453017; doi:10.3389/fimmu.2021.646972), 2021-09-07
Supplement: DataSheet_1.pdf [file DataSheet_1.pdf]

## Supplementary Material

### Appendix A. The sequence of events from virus infection to immune response

The system is in a stable state (apart from random fluctuations due to natural cell death/birth of cells) until an antigen is injected. In this case the virus SARS-CoV-2 is applied at day 0. It follows a sequence of stochastic events promoting cells duplication, cytokine secretion and eventually culminating in the humoral and cellular immune response. Due to the high degree of details of the algorithms enacting such events, an agent-based model is not described by means of mathematical formulas but rather by *Rules* expressed in natural language without sacrificing rigor. The Rules of the agent-based automaton accounting for the main part of immune response to SARS-CoV-2 are listed below. Each rule corresponds to a more-or-less complex algorithm whose details are here neglected because less relevant to the purpose of the present article.

Secretion of cytokines by a cell is done in bulk (*quanta*) roughly corresponding to one pg/ml<sup>a</sup>. All cytokine releases per cell correspond to an amount of  $10^2$  *quanta*, thus  $10^2$  pg/ml. Cytokine secretion by a cell takes place in a time step of the simulation corresponding to 8 hours of real life, whenever the conditions are satisfied (e.g., mate encountering, proper local conditions, ...); the duration of the secretion is therefore 8 hours but the event is repeated until the same conditions cease to be satisfied. Yet, to note, at each step the event is fulfilled with a certain probability that depends on the same conditions.

Also, antibody secretion by plasma B lymphocytes is represented as bulk secretion. Plasma cells secrete antibodies continuously for their whole lifetime.

Cell stimulations are discrete events modeled as Bernoulli events with parameter  $p$  which depends on the specific event. In recognition events as for instance when a T-cell receptor recognizes a viral peptide in the context of class I HLA,  $p$  represent the molecular affinity (as described in section 2.2 of the main manuscript) and that has been previously calculated with immune-bioinformatics prediction tools. Antigen digestion and presentation of viral peptides together with class I or II HLA molecules is also modeled as a Bernoulli event with parameter  $p$  previously estimated with immune-bioinformatics prediction tools.

Cells (but memory lymphocytes which live an order of magnitude longer) and molecules have a predefined life-span. In details, the half-life of B lymphocytes, Plasma B cells, CD4 T helpers, CD8

---

<sup>a</sup> Sullivan et al. (2000). Measurement of cytokine secretion, intracellular protein expression, and mRNA in resting and stimulated peripheral blood mononuclear cells. *Clinical and diagnostic laboratory immunology*, 7(6), 920–924

T cytotoxic and Macrophages is set to one week. Those of Dendritic cells and Natural killers, two weeks<sup>b</sup>. Immunoglobulins IgM have a half-life of 10 days. IgG1 21 days and IgG2 18 days<sup>c</sup>.

The virus has a virtually infinite life-span. The same for Epithelial (virus target) cells and immunocomplexes which are eliminated by macrophage uptake.

Cytokines and signalling molecules in general (IL-2, Danger, IFN $\gamma$ , IL-12, IL-4, TGF $\beta$ , TNF $\alpha$ , IL-10, IL-6, IFN $\beta$ , IL-18, IL-23) are all modelled with a half-life of about 3 days<sup>d</sup>.

1. **Infection:** An infection dose  $V(0) = V_0$  is injected into the simulated volume representing 10 microliters discretised in  $L_x \times L_y \times L_z = 10 \times 5 \times 5 = 250$  lattice points. As described in the manuscript the parameter  $V_0$  has been taken in the range  $[5 - 5 \cdot 10^5]$ .
2. **Endocytosis:** the virus enters epithelial cells (EP). This happens at each time step  $t$  and within each lattice point  $x$  hosting both  $V(t)$  viral particles and the epithelial cell, for each of them, with probability  $1 - (1 - p_A)^{V(t)}$  where the probability  $p_A$  is the parameter described in the manuscripts which has been taken in the interval  $[10^{-3} - 10^{-1}]$  and has units  $\text{day}^{-1}$ .
3. **Biosynthesis:** the viral RNA and viral proteins are made and assembled into new virions that are released by budding (exocytosis) from infected cells (SARS-CoV-2 follows a *lysogenic cycle*, that is, it does not kill the host). The number of viral particles budding from a single infected cell has been chosen about  $10^3$  per day<sup>e</sup>. At this stage, infected/injured EP
  - **DAMPs release:** release danger signal (D) (generally indicating interferon, cytokines, DAMPs = damage associated molecular patterns)
  - **Inflammation:** release IL-6
  - **Endocytic presentation:** process the viral proteins leading to their presentation on class I HLA molecules
4. **B phagocytosis:** B cells phagocyte, internalise, process and present viral peptides on class II HLA
5. Response to Danger:

---

<sup>b</sup> Sprent et al. (1994) Lymphocyte life-span and memory. *Science* 265(5177):1395-1400

<sup>c</sup> Amanna et al. (2010) Mechanisms that determine plasma cell lifespan and the duration of humoral immunity. *Immunol Rev.* 236:125–138

<sup>d</sup> Kindt, T., Goldsby, R., Osborne, B., Kuby, J. and Kuby, J., 2007. *Kuby immunology*. New York: W.H. Freeman.

<sup>e</sup> Gladnikoff et al. (2008) Directly Monitoring Individual Retrovirus Budding Events Using Atomic Force Microscopy. *Biophysical Journal*, 94(1): 320 – 326

- NK response: Natural killer cells (NKs) release IFN $\gamma$  upon bystander stimulation by danger
  - M response: Macrophages (M) respond to danger (e.g., DAMPs) via TLR4 releasing TNF $\alpha$  and IL-6
6. M activation: macrophages become activated by IFN $\gamma$  (activated M have a greater phagocytic activity). This is modeled as a Bernoulli event with parameter  $p = c \times e^{-\frac{I_x}{I_E}}$ , where  $c = 0.9$ ,  $I_x$  is local concentration of IFN $\gamma$  (i.e., in lattice site  $x$ ) and  $I_E$  is a parameter representing the efficiency of interferon in activating M.
7. Active M
- M phagocytosis: M internalise, process and present viral peptides on class II HLA; in presence of IFN $\gamma$  they release IL-12; they also release TNF $\alpha$
  - DC activation: M release TNF $\alpha$  which activate dendritic cells (DC)
8. DC phagocytosis & endocytosis: DC phagocyte, internalise, process and present viral peptides on class II HLA (exocytic pathway) but also on class I HLA (endocytic pathway)
9. Th activation: in presence of danger signal, resting T helper lymphocytes are activated by interaction with peptide-bound HLAs on professional antigen presenting cells (M and DC, mainly DC) surface by means of specific interaction with their T-cell receptors (TCR); if no danger is present, the Th cells becomes anergic upon interaction of its TCR with the HLApeptide complex
10. Th stimulation by APCs: activated Th interacting with antigen presenting cells (M, DC)
- Th duplication: start clone expansion; 50% of the daughter cells become memory cells
  - Th cells release IL-2
  - M release IL-6
  - Th1 release IFN $\gamma$
  - Th2 release IL-4
  - release IL-12 in presence of high local concentration of IFN $\gamma$
  - Treg release TGF $\beta$  and IL-10
11. Th stimulation by B: activated Th interacting with B cells
- B duplication: stimulate B cells to start clone expansion; 50% of the daughter cells become memory cells
  - Th duplication: start clone expansion; 50% of the daughter cells become memory cells
  - release IL-2, IL-12
  - Th1 release IFN $\gamma$
  - Th2 release IL-4
  - Treg release TGF $\beta$  and IL-10

12. Th differentiation: depending on the local concentration of IFN $\gamma$ , IL-10, IL-4, IL-6, IFN $\beta$ , IL-12, IL-18, IL-2, TGF $\beta$  and IL23, active T helper cells undergo class switch into Th1 and Th2. This complex process is modeled as a gene-regulatory-network as described in Santoni et al.<sup>f</sup>
13. B differentiation: B cells differentiate to antibody-secreting plasma B cells (PLB). 50% of duplicating B cells become PLBs. If the B lymphocyte is a memory cells then it generates 80% of PLBs.
14. Isotype switch: B cells perform immunoglobulin class switching, that is, change production of immunoglobulin from the isotype IgM to the isotype IgG. This is modeled as a Bernoulli event with parameter  $p = \frac{(I_x)^3}{C^3 + (I_x)^3}$  where  $C$  is an arbitrary constant and  $I_x$  is the local (i.e., in the lattice point) concentration of the interleukin IL-2.
15. Antibodies production: Plasma cells secrete antibodies at a rate of about 2 ng/day<sup>g</sup>.
16. Humoral response: antibodies inhibit viral particles by opsonization; the result are the immuno-complexes that are eventually cleared by macrophages
17. Tc activation: in presence of IL-2, resting cytotoxic T cells (Tc) are activated by the interaction of their TCR with DC presenting on class I HLA the viral peptides but only in presence of IL-2
18. Tc duplication: activated Tc interact with infected EP cells presenting viral peptides on class I HLA molecule
- Cytotoxic response: kill infected EP (this will further release danger signal)
  - Tc start duplication. 50% of the daughter cells become memory cells

---

<sup>f</sup> Santoni et al. (2008) Implementation of a regulatory gene network to simulate the TH1/2 differentiation in an agent-based model of hypersensitivity reactions. *Bioinformatics* 24 (11), 1374-1380

<sup>g</sup> Brinkmann et al. (1993) T cell-dependent differentiation of human B cells into IgM, IgG, IgA, or IgE plasma cells: high rate of antibody production by IgE plasma cells, but limited clonal expansion of IgE precursors. *Cell Immunol.* 152:323–32.

## Appendix B. HLA class I peptide list

Each column reports the peptides relative to the allele indicated in the first row. Each entry of the table shows the peptide, the rank score and the relative amino acid position. The relative rank score is used to directly compute the probability to successful bind the peptide to the HLA molecule thus presenting the HLA-peptide complex to the cell surface.

| <b>A0201</b>             | <b>A2402</b>              | <b>B3501</b>              | <b>B4002</b>              |
|--------------------------|---------------------------|---------------------------|---------------------------|
| FLAFVVELL 5.26 20-28     | NYMPYFFTL 6.81 2167-2175  | FPFTIYSL 19.41 9-17       | AEWFLAYIL 7.64 2325-2333  |
| SLVKPSFYV 9.11 50-58     | YYTSNPTTF 11.58 1536-1544 | MGYINVFAF 24.08 1-9       | RELHLSWEV 9.9 5484-5492   |
| VLLFLAFV 21.72 17-25     | VYPASWVM 12.54 3653-3661  | YINVFAFPF 26.67 3-11      | AELAKNVSL 16.15 2618-2626 |
| FLLVTLAIL 39.95 26-34    | TYACWHHSI 13.91 6147-6155 | VPFWITIAY 2.43 3136-3144  | REFLTRNPA 17.56 5820-5828 |
| SVLLFLAFV 44.91 16-24    | TYASALWEI 17.94 4090-4098 | LPSLATVAY 2.57 3641-3649  | HEGKTFYVL 18.08 1613-1621 |
| YIDIGNYTV 10.59 73-81    | WSMATYYLF 22.74 900-908   | FAVDAAKAY 3.29 4272-4280  | QEYADVPHL 18.48 5266-5274 |
| FLEYHDRV 36.35 108-116   | LYENAFLPF 30.99 3606-3614 | FAIGLALY 5.25 5614-5622   | HEVLLAPLL 19.05 1141-1149 |
| YVDDPCPI 40.67 31-39     | TYKPNTWCI 31.59 2002-2010 | LVAEWFLAY 5.66 2323-2331  | GEFKLASHM 19.24 912-920   |
| HLVDFQVTI 28.82 3-11     | YRSLPGVF 33.09 3010-3018  | NVLEGSVAY 5.78 2937-2945  | YELQTPFEI 19.31 249-257   |
| FLAHIQWMV 2.45 3122-3130 | FFASFYVW 42.38 2386-2394  | LVYAADPAM 6.16 4764-4772  | GEEANFCAL 19.34 1705-1713 |
| FLLPSLATV 2.81 3639-3647 | MYASAVLL 43.63 3684-3692  | FVSLAIDAY 6.89 5250-5258  | YENAFLPFA 20.53 3607-3615 |
| ILFRFFYV 3.15 2332-2340  | EWFLAYILF 44.08 2326-2334 | MVMCGGSLY 6.96 5058-5066  | LEMELTPV 22.16 1012-1020  |
| SMWALISV 3.32 3732-3740  | SYSSLMPI 45.86 4628-4636  | YPNASFDNF 7.22 1920-1928  | FENKTTLPV 25.51 6494-6502 |
| YLDAYNMMI 3.6 6418-6426  | IYLYTFYL 47.7 3108-3116   | YPGQGLNGY 8.31 1329-1337  | GEYSHVAVF 26.1 3072-3080  |
| FLLNKEMYL 3.7 3183-3191  | QYIKWPWYI 13.22 1208-1216 | VAVKMFDAY 8.52 2586-2594  | VELKHFFFA 32.03 4827-4835 |
| TLMNVTLV 3.75 3710-3718  | VYSTGSNVF 19.05 635-643   | HVGEIPVAY 9.36 110-118    | KENSYTTTI 32.41 1869-1877 |
| VLFSTVFPL 4.5 4707-4715  | NYNYLRYLF 28.87 448-456   | YVNTFSSTF 9.47 2594-2602  | HEFCSQHTM 32.67 5201-5209 |
| YLNLTLLAV 4.53 6850-6858 | YFPLQSYGF 41.54 489-497   | LVSDIDITF 10.85 1270-1278 | EETGLLMPL 33.84 725-733   |
| LLDDFVEI 4.97 6748-6756  | VYFLQSINF 47.43 112-120   | MPYFFTL 11.75 2169-2177   | KEILVTYNC 35.25 4535-4543 |

## Supplementary Material

|                           |                         |                           |                           |
|---------------------------|-------------------------|---------------------------|---------------------------|
| ALLADKFPV 4.99 6244-6252  | LYLYALVYF 49.63 106-114 | YIFFASFY 12.11 2384-2392  | VEYCPIFFI 38.62 3763-3771 |
| TMADLVYAL 5 4515-4523     | SYFIASFRL 27.75 94-102  | YVMHANYIF 12.44 7019-7027 | IELKFNPPA 41.96 1686-1694 |
| YLATALLTL 5.07 1675-1683  | YFIASFRLF 48.15 95-103  | HSIGFDYVY 12.47 6153-6161 | FELEDFIPM 42.48 6714-6722 |
| KLIEYDFA 5.37 2901-2909   |                         | QVVDMSMTY 12.59 1582-1590 | TERLKLFAA 45.15 5450-5458 |
| MMISAGFSL 5.47 6424-6432  |                         | TPAFDKSAF 12.87 6352-6360 | RELKVTFFP 46.3 1953-1961  |
| VLWAHGFE 5.78 6108-6116   |                         | LPGVYSVIY 13.23 3101-3109 | YENFNQHEV 47.17 1135-1143 |
| NLIDSYFVV 5.93 4456-4464  |                         | VPWDTIANY 13.33 2133-2141 | HEHEIAWYT 48.55 234-242   |
| WMVMFTPLV 6.06 3128-3136  |                         | MSNLGMPSY 13.57 2254-2262 | FEVVSQPFL 16.77 168-176   |
| WLMWLIINL 6.6 2363-2371   |                         | TVLCLTPVY 13.78 3090-3098 | SEFRVYSSA 25.84 155-163   |
| KLSYGIATV 6.77 5469-5477  |                         | LPVNVAFEL 14.41 6500-6508 | FELLHAPAT 41.23 515-523   |
| YMPYFFTLL 7.12 2168-2176  |                         | VPFVSTGY 14.57 4730-4738  | SELVIGAVI 43.47 136-144   |
| LLFLMSFTV 7.19 3083-3091  |                         | FPLTSFGPL 14.72 4713-4721 |                           |
| YTMADLVYA 7.34 4514-4522  |                         | FVVEVVDKY 14.91 4863-4871 |                           |
| YLTNDVSFL 7.42 3115-3123  |                         | LPLTQYNRY 16.09 3199-3207 |                           |
| FLARGIVFM 7.71 3753-3761  |                         | FSAVGNICY 16.33 2889-2897 |                           |
| ALWEIQQVV 7.85 4094-4102  |                         | MADQAMTQM 16.41 4004-4012 |                           |
| FVNEFYAYL 8.24 5132-5140  |                         | WVYKQFDY 18.56 6433-6441  |                           |
| ILHCANFNV 8.64 4699-4707  |                         | LPFKLTCAT 18.64 2738-2746 |                           |
| AIFYLITPV 8.72 2785-2793  |                         | LPSYAAFAT 19.53 3951-3959 |                           |
| KLNVGDYFV 9.02 5541-5549  |                         | IAMSAFAMM 19.56 3619-3627 |                           |
| LVLSVNPYV 9.08 5364-5372  |                         | LAKDTTEAF 19.63 3900-3908 |                           |
| FLNRFTTLL 9.14 3482-3490  |                         | NPHLMGWDY 19.87 5003-5011 |                           |
| NLSDRVVFV 9.53 6100-6108  |                         | NAAISDYDY 21.38 4839-4847 |                           |
| LMIERFVSL 9.68 5245-5253  |                         | QAWQPGVAM 21.65 6800-6808 |                           |
| QLFFSYFAV 10.01 2348-2356 |                         | FCLEASFNY 22.36 2209-2217 |                           |

|                           |  |                            |  |
|---------------------------|--|----------------------------|--|
| RIMTWLDMV 10.03 3662-3670 |  | LASHMYCSF 22.93 916-924    |  |
| LLSAGIFGA 10.09 1148-1156 |  | VVYRGTTY 23.66 5532-5540   |  |
| LLLTILTSL 10.2 3583-3591  |  | FSSTFNVPIM 24.37 2598-2606 |  |
| FVDGVPFVV 10.2 4726-4734  |  | NPPALQDAY 25.39 1691-1699  |  |
| LLADKFPVL 11.11 6245-6253 |  | KPVETSNSF 25.51 2017-2025  |  |
| FLPRVFAV 11.73 2884-2892  |  | HVASCDAIM 26.09 6192-6200  |  |
| FVAEIFYLI 11.96 2782-2790 |  | VVIPDYNTY 26.32 4072-4080  |  |
| YLASGGQPI 11.96 4283-4291 |  | FVSDADSTL 27 6900-6908     |  |
| VMVELVAEL 12.28 84-92     |  | MGIAMSAF 27.34 3616-3624   |  |
| ILTSLLV 12.61 3587-3595   |  | YVFTVNAL 27.98 5678-5686   |  |
| LMWLIINLV 13.29 2364-2372 |  | FVLTSHTVM 31.42 5548-5556  |  |
| VLAWLYAAV 13.4 3467-3475  |  | FVVSTGYHF 34.54 4732-4740  |  |
| VLSFCAFAV 13.64 4266-4274 |  | NALDQAISM 35.01 3725-3733  |  |
| LLMPILTLT 14.16 4632-4640 |  | LATNNLVVM 35.31 590-598    |  |
| RLIDAMMFT 14.25 579-587   |  | LIISVTSNY 37.11 3736-3744  |  |
| VMCGGSLYV 14.27 5059-5067 |  | LPFAMGIIA 38.16 3612-3620  |  |
| GLNDNLLEI 14.57 445-453   |  | LMNVLTLYV 38.72 3711-3719  |  |
| FLGRYMSAL 14.93 1642-1650 |  | TVAYFNMVY 39.68 3646-3654  |  |
| KLMPVCVET 15.05 1387-1395 |  | FAWWTAFVT 39.78 6984-6992  |  |
| FVMMSAPPA 15.07 1804-1812 |  | MVTNNTFTL 41.13 807-815    |  |
| YVWKSYPHV 15.2 2392-2400  |  | YGQQFGPTY 44.09 1590-1598  |  |
| TQWSLFFFL 15.7 3598-3606  |  | FVNLKQLPF 44.48 6360-6368  |  |
| MLDMYSVML 15.97 5290-5298 |  | LAVFDKNLY 45.24 1175-1183  |  |
| YLNSTNVTI 17.19 2270-2278 |  | YVGLAAIM 45.87 2339-2347   |  |
| TLIGDCATV 17.61 6907-6915 |  | VVVNAANVY 45.93 1056-1064  |  |

## Supplementary Material

|                           |  |                            |  |
|---------------------------|--|----------------------------|--|
| KLWAQCVQL 17.72 3886-3894 |  | CTDDNALAY 46.96 4163-4171  |  |
| NLLKDCPAV 18.8 4480-4488  |  | YLVQQESPF 47.27 1796-1804  |  |
| QLMCQPILL 18.97 2563-2571 |  | DASGKVPVY 48.47 2924-2932  |  |
| IWFLLLSV 19.01 2230-2238  |  | LAAIMQLFF 49.25 2343-2351  |  |
| LLTNMFTPL 19.31 3026-3034 |  | LALYNKYKY 49.28 3208-3216  |  |
| QMAPISAMV 19.63 2373-2381 |  | IPFAMQMAY 2.99 896-904     |  |
| FLNGSCGSV 19.67 3403-3411 |  | FAMQMAYRF 5.03 898-906     |  |
| SLAIDAYPL 20.82 5252-5260 |  | LGAENSVAY 6.31 699-707     |  |
| FLMSFTVLC 23.05 3085-3093 |  | SANNCTFEY 7.78 162-170     |  |
| MQLFFSYFA 23.12 2347-2355 |  | WPWYIWLGF 8.91 1212-1220   |  |
| ILGTVSWNL 23.63 1367-1375 |  | VASQSIIAY 8.93 687-695     |  |
| LLDDFVEII 23.67 6749-6757 |  | LPFNDGVYF 9.15 84-92       |  |
| KLKDCVMYA 23.81 3678-3686 |  | FVSNNGTHWF 17.28 1095-1103 |  |
| SLPGVFCGV 24.07 3013-3021 |  | LPPLLTDEM 25.98 861-869    |  |
| TLGVYDYL 24.56 3807-3815  |  | LPPAYTNSF 26.5 24-32       |  |
| WLPTGTLV 24.8 6885-6893   |  | AALQIPFAM 26.99 892-900    |  |
| SLLSVLLSM 25.87 3913-3921 |  | FVFNIDGY 28.18 192-200     |  |
| TLSEQLDFI 26.42 214-222   |  | MIAQYTSAL 28.51 869-877    |  |
| ILLDQALV 27.11 2569-2577  |  | NATRFASVY 32.3 343-351     |  |
| LQLGFSTGV 27.69 6031-6039 |  | FPREGVFVS 35.75 1089-1097  |  |
| AIMTRCLAV 28.95 6198-6206 |  | YSSANNCTF 38.72 160-168    |  |
| MLWCKDGHV 29.26 6781-6789 |  | LPFFSNVTW 39.55 56-64      |  |
| FLALCADSI 29.8 685-693    |  | CVADYSVLY 40.54 361-369    |  |
| KMFDAYVNT 30.2 2589-2597  |  | CPDGVKHVY 25.7 67-75       |  |
| SLIYSTAAL 30.84 2242-2250 |  | LATCELYHY 30.47 12-20      |  |



|                           |  |                         |  |
|---------------------------|--|-------------------------|--|
| VLLSVLQQL 32.87 3871-3879 |  | IPIQASLPP 3.4 35-43     |  |
| ILSPLYAFA 33.74 529-537   |  | VAAGLEAPF 21.19 97-105  |  |
| FMCVEYCPI 33.94 3760-3768 |  | FLCWHTNCY 41.02 146-154 |  |
| FTVLCLTPV 34.4 3089-3097  |  | YANRRNFLY 16.49 39-47   |  |
| AMQTMLFTM 34.53 4028-4036 |  | VATSRTLSY 31.18 170-178 |  |
| MMILSDDAV 35.14 5146-5154 |  | FAYANRNRF 38.08 37-45   |  |
| YLITPVHVM 35.35 2788-2796 |  | TPSGTWLTY 4.73 325-333  |  |
| KLNEEIAII 36.42 468-476   |  | LPAADLDDF 10.96 395-403 |  |
| KLVNKFLAL 36.64 680-688   |  | LPNNTASWF 14.87 45-53   |  |
| VMAYITGGV 37.8 597-605    |  | FAPSASAFF 29.99 307-315 |  |
| MLFTMLRKL 37.82 4032-4040 |  | KAYNVTOAF 32.16 266-274 |  |
| GLALYYPSA 37.83 5617-5625 |  |                         |  |
| TLVPQEHYV 38.21 5562-5570 |  |                         |  |
| SLENVAFNV 38.77 6452-6460 |  |                         |  |
| KMVSLLSVL 39.75 3910-3918 |  |                         |  |
| SQLGGLHLL 40.62 6694-6702 |  |                         |  |
| VLLAPLLSA 40.78 1143-1151 |  |                         |  |
| YLYLTFYLT 41.51 3109-3117 |  |                         |  |
| NMLRIMASL 41.52 5020-5028 |  |                         |  |
| FLRDGWEIV 42.13 641-649   |  |                         |  |
| FLKKDAPYI 42.2 1278-1286  |  |                         |  |
| NTFSSTFNV 43.65 2596-2604 |  |                         |  |
| FLPGVYSVI 43.7 3100-3108  |  |                         |  |
| MLSDTLKNL 44.66 6093-6101 |  |                         |  |
| GLFKDCSKV 45.87 5930-5938 |  |                         |  |

|                           |  |  |  |
|---------------------------|--|--|--|
| KLNIKLLGV 46.87 3839-3847 |  |  |  |
| TLGVLPVPHV 48.05 103-111  |  |  |  |
| YVFCTVNAL 48.78 5678-5686 |  |  |  |
| SLPSYAafa 48.84 3950-3958 |  |  |  |
| YLQPRTFLL 5.36 269-277    |  |  |  |
| FQFCNDPFL 9.18 133-141    |  |  |  |
| FIAGLIAIV 10.29 1220-1228 |  |  |  |
| SIIAYTMSL 13.54 691-699   |  |  |  |
| RLQSLQTYV 16.66 1000-1008 |  |  |  |
| FTISVTTEI 25.37 718-726   |  |  |  |
| LLFNKVTLA 25.41 821-829   |  |  |  |
| HLMSFPQSA 26.36 1048-1056 |  |  |  |
| VLNDILSRL 33.57 976-984   |  |  |  |
| KIADYNYKL 36.12 417-425   |  |  |  |
| VVFLHVTYV 36.56 1060-1068 |  |  |  |
| RLDKVEAEV 38.95 983-991   |  |  |  |
| FVFLVLLPL 41.68 2-10      |  |  |  |
| KLFIHQEEV 31.81 85-93     |  |  |  |
| YLYALVYFL 2.67 107-115    |  |  |  |
| LLYDANYFL 3.06 139-147    |  |  |  |
| ALSKGVHFV 7.25 72-80      |  |  |  |
| ALLAVFHSA 17.03 51-59     |  |  |  |
| TVYSHLLLV 28.4 89-97      |  |  |  |
| ALVYFLQSI 37 110-118      |  |  |  |
| GLMWLSYFI 3.87 89-97      |  |  |  |

|                         |  |  |  |
|-------------------------|--|--|--|
| KLLEQWNLV 7.57 15-23    |  |  |  |
| FVLAAYVRI 16.52 65-73   |  |  |  |
| SMWSFPET 19.09 108-116  |  |  |  |
| FLFLTWICL 32.26 26-34   |  |  |  |
| FLWLLWPVT 32.54 53-61   |  |  |  |
| TLACFVLA 33.11 61-69    |  |  |  |
| FIASFRLFA 46.41 96-104  |  |  |  |
| LLLDRLNQL 14.81 222-230 |  |  |  |

## Appendix C. HLA class II peptides

Each column reports the peptides relative to the HLA indicated in the first row. Each entry of the table shows the peptide and the relative rank score. The relative rank score is used to directly compute the probability to successful bind the peptide to the HLA molecule thus presenting the HLA-peptide complex to the cell surface.

| <b>DRB1_0701</b> | <b>DRB1_1501</b> |
|------------------|------------------|
| PFTIYSLLL 1.70   | LLLCRMNSR 1.20   |
| YVYSRVKNL 0.25   | IYSLLLCRM 1.40   |
| LAILTALRL 0.40   | LAILTALRL 0.20   |
| FVYSRVKN 0.70    | FVYSRVKN 0.50    |
| TLAILTALR 1.90   | TLAILTALR 1.00   |
| IITVAAFH 1.10    | YVYSRVKNL 1.90   |
| LIIMRTFKV 0.04   | IHFYSKWYI 0.40   |
| FQVTIAEIL 0.25   | IITVAAFH 0.60    |
| IIKNLSKSL 1.10   | LIIMRTFKV 0.01   |
| YIINLIKN 1.80    | LLIIMRTFK 0.17   |

|                |                |
|----------------|----------------|
| FYLITPVHV 0.04 | YIINLIKN 1.00  |
| YFVLTSHTV 0.06 | IKNLSKSL 1.30  |
| FKHLIPLMY 0.08 | INLIKNLS 1.40  |
| FRYMNSQGL 0.12 | FHLYLQYIR 0.02 |
| FTRSTNSRI 0.12 | AYYFMRFR 0.02  |
| FSASTSAFV 0.12 | FYAYLRKHF 0.03 |
| AYYFMRFR 0.17  | FLAYILFTR 0.05 |
| FVVSTGYHF 0.20 | YLQYIRKLH 0.06 |
| FVKHKHAF 0.20  | FMRFRRAF 0.06  |
| ARYMRSKLV 0.20 | YYFMRFR 0.09   |
| FHLYLQYIR 0.20 | CLLNRYFRL 0.12 |
| VRSIFSRTL 0.25 | FLHFLPRVF 0.12 |
| CLLNRYFRL 0.25 | FCLLNRYFR 0.15 |
| FLAHIQWMV 0.25 | IFYLITPVH 0.15 |
| LRKHFSMMI 0.30 | LAYYFMRFR 0.17 |
| FYAYLRKHF 0.30 | FVKHKHAF 0.20  |
| FLALCADI 0.30  | FFKLVNKFL 0.25 |
| LRANSAVKL 0.40 | MMCYKRNR 0.25  |
| YYFMRFR 0.40   | LYLQYIRKL 0.25 |
| FLLNKEMYL 0.40 | IIQFPNTYL 0.25 |
| FLHFLPRVF 0.40 | FKHLIPLMY 0.25 |
| YRGTTYKLV 0.40 | YWFFSNYLV 0.30 |
| FFKLVNKFL 0.40 | YLALYNKYK 0.30 |
| YLNTLTLAV 0.40 | IFFITGNL 0.30  |
| ICYTPSKLI 0.40 | YVWWSYVH 0.30  |

|                |                |
|----------------|----------------|
| FNYLKSPNF 0.40 | IMASLVLR 0.30  |
| YVMHANYIF 0.40 | YNRYLALYN 0.30 |
| YFYTSKTTV 0.40 | FLAHIQWMV 0.30 |
| LRLIDAMMF 0.40 | WFFSNYLKR 0.30 |
| IYSTAALGV 0.40 | ILAYCNKTV 0.30 |
| YRVTKNSKV 0.40 | YFMRFRRAF 0.40 |
| IFFITGNTL 0.50 | FYLITPVHV 0.40 |
| WFFSNYLKR 0.50 | LALYYPSAR 0.40 |
| YFVVKRHTF 0.50 | KVKYLYFIK 0.40 |
| LRIMASLVL 0.50 | VMYMGTSY 0.40  |
| FCSQHTMLV 0.50 | FYYVWKSIV 0.40 |
| YDKLVSSFL 0.50 | TMLFTMLRK 0.50 |
| FAVSKGFFK 0.50 | FYWFFSNYL 0.50 |
| FFITGNTLQ 0.60 | LRIMASLVL 0.50 |
| YLQYIRKLH 0.60 | FFLYENAFI 0.50 |
| YWFFSNYLK 0.60 | LILMTARTV 0.50 |
| FKLTCATTR 0.60 | IVKFISTCA 0.50 |
| YKLRSDVL 0.60  | VFHLYLQYI 0.50 |
| FKLVNKFLA 0.60 | LLQLCTFTR 0.60 |
| YCALAPNMM 0.70 | FKLVNKFLA 0.60 |
| YRRLISMMG 0.70 | VNEFYAYLR 0.60 |
| LSVLQQLRV 0.70 | FLLNKEMYI 0.60 |
| FVNLNLRA 0.70  | ISAMVRMYI 0.60 |
| FLAYILFTR 0.70 | FYFYTSKTT 0.60 |
| LKLFAAETL 0.80 | LRLIDAMMF 0.60 |

|                 |                 |
|-----------------|-----------------|
| YYVWKSYPVH 0.80 | LHLLIGLAK 0.60  |
| FYFYTSKTT 0.80  | IICISTKHF 0.60  |
| YIICISTKH 0.80  | ARYMRSCLKV 0.60 |
| YMRSCLKVPA 0.80 | YFVLTSHTV 0.60  |
| YVRNLQHRL 0.80  | VLYYQNNVF 0.60  |
| IIQFPNTYL 0.80  | ILSLLSKGR 0.70  |
| WNVVRIKIV 0.80  | LFLPLSLAT 0.70  |
| IERFVSLAI 0.80  | IERFVSLAI 0.70  |
| FYYVWKSYPV 0.80 | LRKHFSMMI 0.70  |
| NYVFTGYRV 0.80  | FAVSKGFFK 0.70  |
| LVLSVNPYV 0.80  | NYVFTGYRV 0.70  |
| LKTLATHGL 0.90  | MLRIMASLV 0.70  |
| LFAAETLKA 0.90  | LVLSVNPYV 0.70  |
| IFYLITPVH 0.90  | LKLFDRYFK 0.70  |
| VHFISNSWL 0.90  | IKNFKSVLY 0.70  |
| YLNSTNVTI 0.90  | FRYMNSQGL 0.70  |
| SLSHRFYRL 0.90  | VRSIFSRTL 0.70  |
| IICISTKHF 0.90  | YIICISTKH 0.70  |
| TYFTQSRNL 1.00  | YFVVKRHTF 0.80  |
| HVISTSHKL 1.00  | VHFISNSWL 0.80  |
| IMASLVLAR 1.00  | FVVSTGYHF 0.80  |
| FNSVCRLMK 1.00  | LISMMGFKM 0.80  |
| FAYTKRNV I 1.00 | AMMFVKHKK 0.80  |
| FYWFFSNYL 1.00  | FAMMFVKHKK 0.80 |
| FSYFAVHFI 1.00  | FFSNYLKRR 0.80  |

|                |                 |
|----------------|-----------------|
| VKILNNLGV 1.10 | YLYFIKGLN 0.80  |
| YFIKGLNNL 1.10 | LSVLQQLRV 0.80  |
| FMRFRRAFG 1.10 | LMPILTTR 0.80   |
| YYRSLPGVF 1.10 | ILRVYANLG 0.80  |
| VVLMDSII 1.10  | LLILMTART 0.80  |
| YLITPVHVM 1.10 | MMFVKHKHA 0.80  |
| MLRIMASLV 1.10 | VLLILMTAR 0.90  |
| LLKSIAATR 1.10 | IAIILASFS 0.90  |
| LILMTARTV 1.10 | LYKMQRMLL 0.90  |
| IQLSSYSLF 1.10 | LHFLPRVFS 0.90  |
| YLDAYNMMI 1.10 | LYFIKGLNN 1.00  |
| FCLLNRYFR 1.10 | YKVYYGNAL 1.00  |
| HFISNSWLM 1.10 | IIAMSAFAM 1.00  |
| ILAYCNKTV 1.10 | FSNYLKRRV 1.00  |
| FYILPSIIS 1.10 | YMRSCLKVPA 1.00 |
| KFLTENLLL 1.10 | LFAYTKRNV 1.00  |
| IISVTSNYS 1.10 | FKMFYKGVV 1.00  |
| FFLYENAFV 1.20 | LLIGLAKRF 1.10  |
| YKVYYGNAL 1.20 | FGLFCLLNR 1.10  |
| FVFPLNSII 1.20 | MVYMPASWV 1.10  |
| ALYYPSARI 1.20 | LNRYFRLTL 1.10  |
| IKNFKSVLY 1.20 | YVMHANYIF 1.10  |
| PIQLSSYSL 1.30 | LYVNKHAFH 1.10  |
| LYLQYIRKL 1.30 | YRRLISMMG 1.10  |
| YNRYLALYN 1.30 | YNLWNTFTR 1.20  |

|                 |                |
|-----------------|----------------|
| FYLTDVVSF 1.30  | YVRITGLYP 1.20 |
| NYMLTYNKV 1.30  | LYYQNNVFM 1.20 |
| LREVRTIKV 1.30  | YKHYPSPFK 1.20 |
| FFSNYLKRR 1.30  | YRLYLDAYN 1.20 |
| SLLSKGRLI 1.30  | LSTFISAAR 1.20 |
| CQYLNTLTL 1.30  | ILTLTRALT 1.20 |
| LRVESSSKL 1.30  | CLAYYFMRF 1.20 |
| LIYSTAALG 1.30  | FYLPSIIS 1.20  |
| YKRNRRATRV 1.40 | IIFLEGETL 1.20 |
| IQITISSFK 1.40  | LKLFAAETL 1.30 |
| YFTQSRNLQ 1.40  | YIKWDLLKY 1.30 |
| FYTSKTTVA 1.40  | ILLDQALV 1.30  |
| FKLSYGIAT 1.40  | FSYFAVHFI 1.30 |
| YYRYNLPTM 1.40  | IISVTSNYS 1.30 |
| VCGVSAARL 1.40  | LIINLVQMA 1.30 |
| FSNYLKRRV 1.40  | VKILNNGV 1.40  |
| FTTVDNINL 1.40  | AIRHVRAWI 1.40 |
| FISTCACEI 1.40  | FVNLDNLRA 1.40 |
| FCLEASFNY 1.50  | VVQLTSQWL 1.40 |
| YFMRFRRAF 1.50  | ISQYSLRLI 1.40 |
| LFYSYATHS 1.60  | IQLKSAYE 1.40  |
| IVKFISTCA 1.60  | TFFKLVNKF 1.40 |
| LTLTRALTA 1.60  | TCLAYYFMR 1.50 |
| FIKGLNNLN 1.60  | LTSMKYFVK 1.50 |
| YVRITGLYP 1.60  | ALYPSARI 1.50  |



|                |                |
|----------------|----------------|
| FYRLANCA 1.60  | YVRNLQHRL 1.60 |
| IPLTTAAKL 1.60 | SLSHRFYRL 1.60 |
| YVDNSSLTI 1.60 | CVSFCYMHH 1.60 |
| INIVGDFKL 1.60 | VRRSFYVYA 1.60 |
| TRVLSNLL 1.70  | IIKTIQPRV 1.60 |
| LKLTDNVYI 1.70 | YYRYNLPTM 1.70 |
| ISQYSLRLI 1.70 | LFCLLNRYF 1.70 |
| YFNSVCRLM 1.70 | VYSFLPGVY 1.70 |
| MMCYKRNR 1.70  | VNSFSGYLK 1.70 |
| YMSALNHTK 1.70 | LVASIKNFK 1.70 |
| HMVVKAALL 1.70 | LLKSIAATR 1.70 |
| KQLIKVTLV 1.70 | FNSVCRLMK 1.70 |
| LSTFISAAR 1.70 | WMVMFTPLV 1.70 |
| LSVVNARLR 1.80 | VAYRKVLLR 1.70 |
| LLQLCTFTR 1.80 | YFIKGLNNL 1.80 |
| GISQYSLRL 1.80 | LLTILTSL 1.80  |
| FSSTFNVPM 1.80 | IQITISSFK 1.80 |
| LIINLVQMA 1.80 | IYLYLTFYL 1.80 |
| VMYMGTLSY 1.80 | FLALCADSI 1.80 |
| LRGTAVMSL 1.90 | LTSFGPLVR 1.80 |
| VRETMSYLF 1.90 | FVMMSAPPA 1.80 |
| HFIETISLA 1.90 | LSLLSKGRL 1.90 |
| VRIKIVQML 1.90 | LALYNKYKY 1.90 |
| MHAASGNLL 1.90 | RYLALYNKY 1.90 |
| YLAVFDKNL 1.90 | FFSYFAVHF 1.90 |

|                |                |
|----------------|----------------|
| FKLNEEIAI 1.90 | IVQMLSDTL 1.90 |
| IYQTSNFRV 0.06 | MMGFKMNYQ 1.90 |
| FQTLALHR 0.08  | VNKFLALCA 1.90 |
| FAMQMAYRF 0.12 | FQTLALHR 0.09  |
| FASVYAWNR 0.20 | NYLYRFRK 0.17  |
| YLQPRFLL 0.40  | FAMQMAYRF 0.20 |
| YRFRKSNL 0.50  | ITRFQTLA 0.20  |
| IAQYTSALL 0.60 | YNYLYRFR 0.25  |
| FNATRFASV 0.60 | IYQTSNFRV 0.40 |
| ITRFQTLA 0.60  | FASVYAWNR 0.40 |
| FTISVTTEI 0.70 | YRFRKSNL 0.50  |
| FCTQLNRAL 0.80 | LLALHRSYL 0.60 |
| RFQTLALH 1.10  | IAQYTSALL 0.70 |
| FFSNVTWFH 1.10 | VYAWNRKRI 0.80 |
| NYLYRFRK 1.20  | IIAYTMSLG 1.00 |
| LALHRSYLT 1.20 | FFSNVTWFH 1.00 |
| LLFNKVTLA 1.40 | YLYRFRKS 1.10  |
| VFRSSVLHS 1.50 | LLFNKVTLA 1.30 |
| YNYLYRFR 1.50  | RFQTLALH 1.30  |
| FGAGAALQI 1.70 | VTWFHAIHV 1.30 |
| FGAISSVLN 1.80 | VLSFELLHA 1.60 |
| IDRLITGRL 1.80 | LALHRSYLT 1.70 |
| FRVQPTESI 1.90 | ITLCFTLKR 1.40 |
| INITRFQTL 1.90 | VYQLRARSV 1.60 |
| FRVYSSANN 1.90 | VKHVYQLRA 1.90 |

|                |                |
|----------------|----------------|
| CVLGQSKRV 1.90 | FLQSINFVR 0.30 |
| VYQLRARSV 0.50 | VTFYIYNKI 0.30 |
| FVTVYSHLL 0.06 | INFVRIIMR 0.40 |
| FLQSINFVR 0.17 | FVTVYSHLL 0.60 |
| YNSVTSSIV 0.20 | YFLQSINFV 0.70 |
| VFHSASKII 0.40 | VYFLQSINF 0.80 |
| YYQLYSTQL 0.60 | LVYFLQSIN 0.80 |
| YFLQSINFV 0.80 | LFVTVYSHL 1.00 |
| INFVRIIMR 0.90 | LLFVTVYSH 1.10 |
| YQLYSTQLS 0.90 | VRIIMRLWL 1.30 |
| YFTSDYYQL 1.10 | TFFIYKIV 1.50  |
| WQLALSKGV 1.10 | NFVRIIMRL 1.60 |
| LALSKGVHF 1.10 | FMRIFTIGT 1.80 |
| FVRATATIP 1.20 | LSYFIASFR 0.03 |
| VRATATIP 1.40  | FAAYSRYRI 0.08 |
| LFVTVYSHL 1.40 | FRLFARTRS 0.10 |
| VYFLQSINF 1.70 | SYFIASFRL 0.15 |
| SYFIASFRL 0.05 | FIASFRLFA 0.17 |
| FVLAAYYRI 0.05 | IASFRLFAR 0.20 |
| FAAYSRYRI 0.08 | FVLAAYYRI 0.25 |
| FRLFARTRS 0.15 | LLQFAYANR 0.40 |
| LSYFIASFR 0.17 | VILRGHLRI 1.20 |
| YKLGASQRV 0.60 | CFVLAAYYR 1.50 |
| ITVATSRTL 0.80 | RFLYIIKLI 1.70 |
| IASFRLFAR 0.90 | YYRRATRR 1.50  |

|                |                |
|----------------|----------------|
| FIASFRLFA 1.00 | QVILLNKHI 1.70 |
| LLQFAYANR 1.40 |                |
| LTYTGAIKL 0.20 |                |
| YRRATRRI 0.20  |                |
| YRRATRRIR 1.20 |                |

### Appendix D. Example readout of a simulation

Figure 1 shows in panel A how the viral load  $V(t)$  (both soluble, meaning outside infected cells, and proviral, meaning inside infected cells, and the sum of the two), varies with time: the viral particles of SARS-Cov-2 injected at day 0, peaking at about day 5 and start to decline after that and in correspondence to the appearance of antibody producing plasma cells (panel B of Figure 2). In the same panel the immunoglobulins titers are plotted (split in IgM and IgG, further split in IgG1 and IgG2) together with the immunocomplexes (IC) that are antibodies bound to viruses (i.e., opsonised viruses). This plot shows a humoral response surging at about day 12 and clearing the virus in about five days. It also shows that the antibody levels remain high for some time after the simulation ends at day 30.

Panel (B) plots in arbitrary scale the cytokine concentrations for interleukins, interferon and danger signal (inset plot of the same panel). In particular this run shows a high level of IFN $\gamma$ , IL-6, IL-2 and IL-12 elicited by the infection besides a moderate production of danger signal (D, in the inset plot of panel B). Release of cytokines follows from the dynamical rules characterizing the agent's behavior reported in Appendix A.

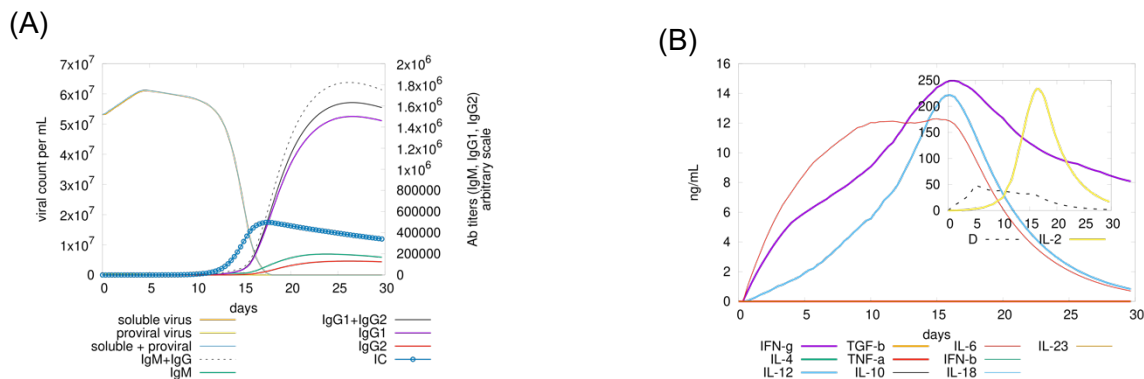

**Figure 1** Viral load  $V(t)$ , immunoglobulins (IgM and IgG) and the immunocomplexes (IC) are shown in panel A. The same panel shows the viral particles of SARS-Cov-2 injected at day 0, peaking at about day 5 and start to decline after that and in correspondence to the appearance

**of antibody producing plasma cells (panel B of Figure 2). Panel B shows the cytokines generated during the immune response (see text for details).**

Panel A of Figure 2 shows the total counts of the B-cells in all phenotypes, that is, memory and not memory, and the three isotypes IgM, IgG1 and IgG2 (i.e., cells that will become plasma B cells producing IgM or IgG antibodies).

Panel B shows the count of antibody-generating plasma cells subdivided in the three classes IgM, IgG1 and IgG2.

Panel C gets into the details of the ABM simulation model by showing the counts of B-cells subdivided according to the internal state assumed. Worth to note that the cells enter the duplication state only after day 10 and until day 20 because besides presenting the viral peptides on their HLA molecules, they need to be stimulated by stimulated cognate helper T cells bearing the “correct” cell receptor (panel D of same Figure 2). Note also that upon clearance of the virus (cf. panel A of Figure 1) the B-cell population switches back to the “active” state and terminates the presentation of the viral proteins.

Panel D shows cell counts for CD4 T-cell population (total number, memory cells, not memory). Some days after the infection and upon successful interaction with antigen presenting cells, T helper lymphocytes start to duplicate and differentiate into memory. They also foster cytotoxicity (cf. panel A and B of Figure 3) and humoral response (cf. panel B of Figure 2) through secretion of cytokines (panel B of Figure 1). As for B cells in panel A, panel E shows Th counts specifying the internal state of the lymphocyte thus revealing the “activation” phase starting quite soon before day 5 and the duplication phase starting immediately after and ending at about day 20. Of note, some cell become anergic around day 15 for lack of “danger” (second) signal upon activation (Rule n.9 in Appendix A).

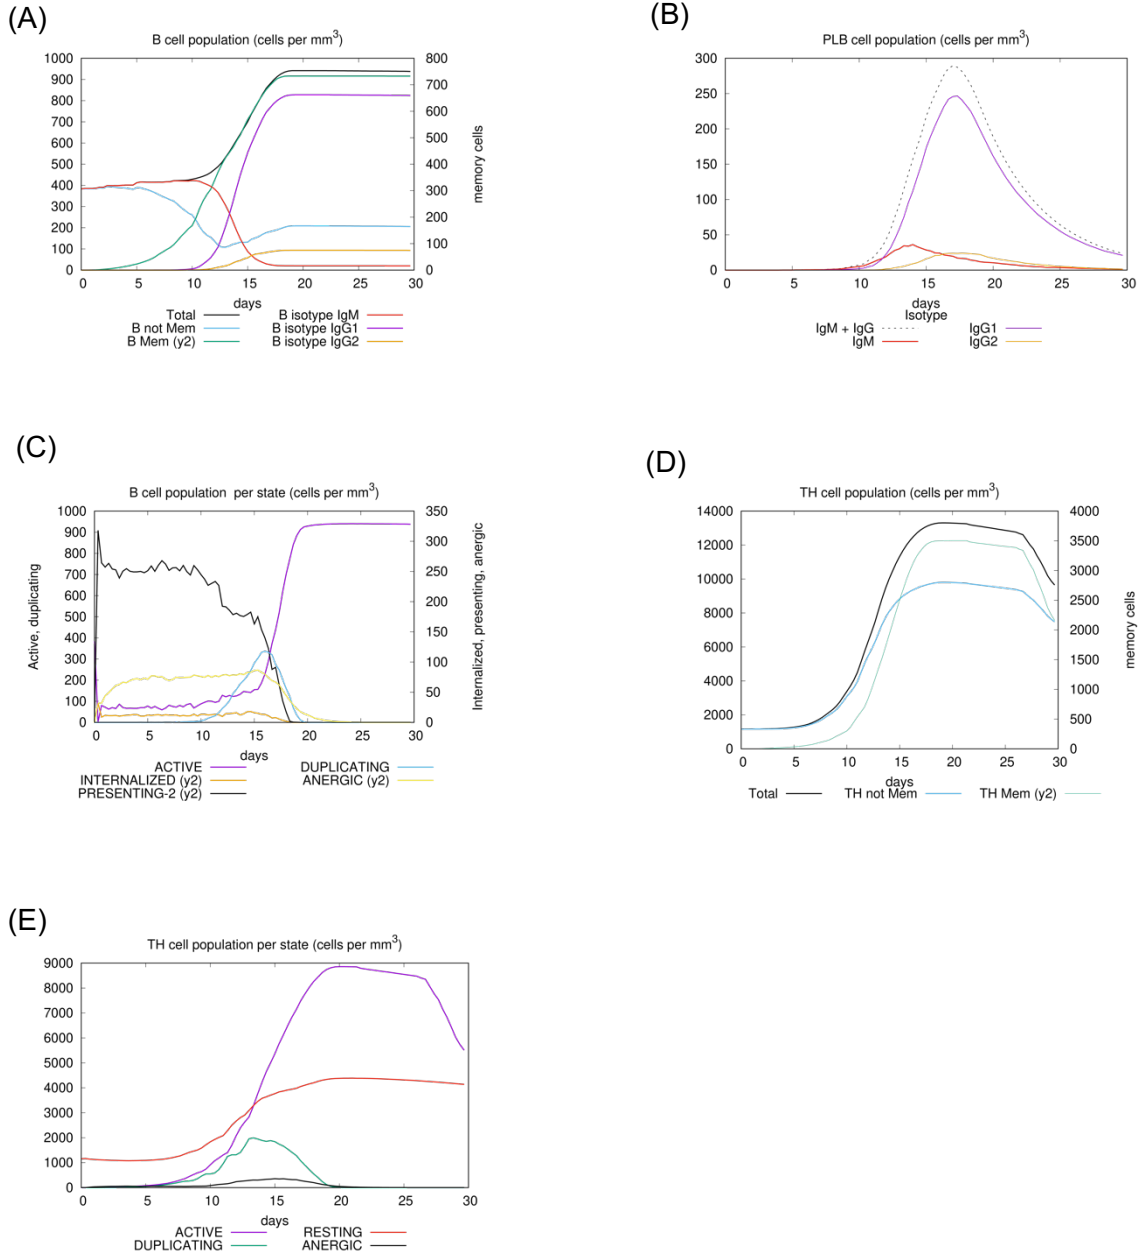

**Figure 2** This figure shows details of the population dynamics of B-cells (panel A and C), plasma B cells (PLB in panel B) and helper T lymphocytes (panel D and E).

Panel A of Figure 3 plots the cell counts for CD8 T-cell population (total number, memory cells, not memory). Panel B shows the counts per internal cell state revealing a limited number of anergic cells (numbers on the y2-axis), the early activation of a large number from day 3 (and corresponding decrease of resting cells) entering a duplication phase peaking ad day 5 but progressing through about day 18.

Panels C and D show the total number and the breakout counts for antigen presenting cells DC (dendritic cells in panel C) and MA (that we also indicated as M, macrophages, in panel D). In particular the presentation activity following the internalization of the virus by macrophages terminates at about day 20. Similar behavior is shown in panel E for dendritic cells. Interestingly more macrophages are activated following Rule n.6 (in Appendix A) due to the high level of IFN $\gamma$  released by natural killer cells (cf. Rule n.5 in Appendix A) upon bystander stimulation by danger signals (or damage associated molecules, cf. panel B of Figure 1) secreted by infected cells.

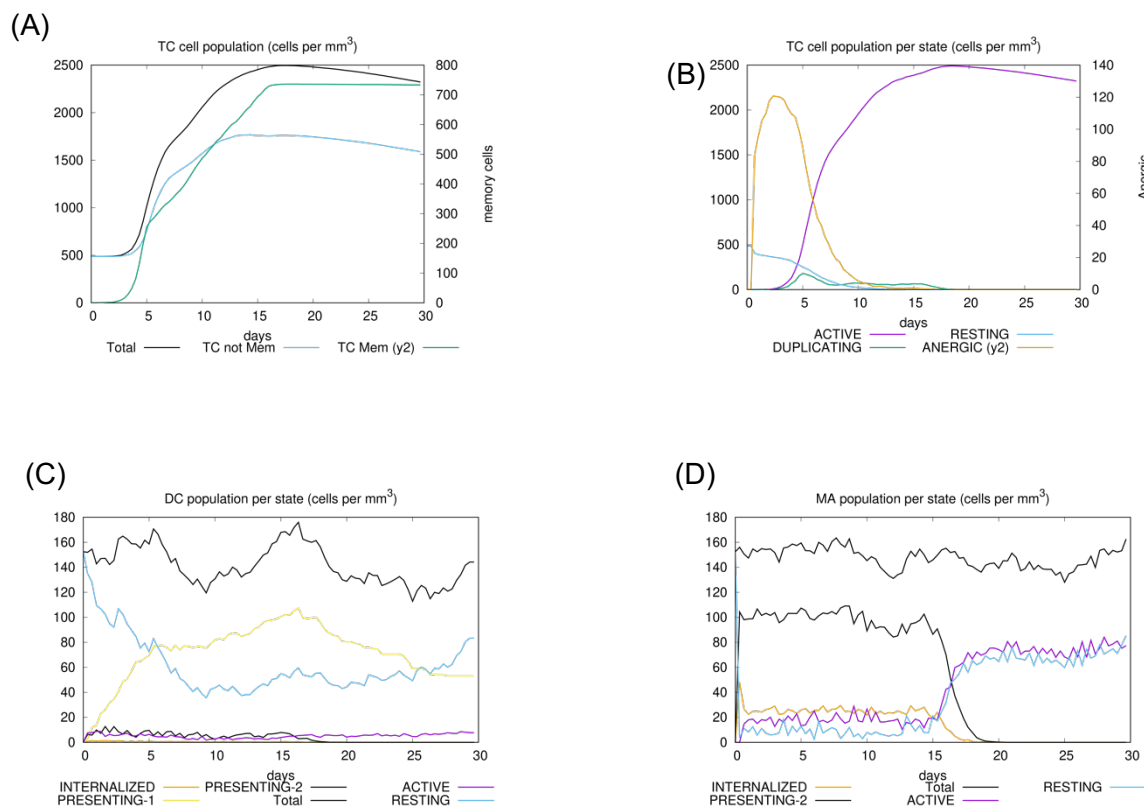

**Figure 3** Here we plot the cell counts and detailed intra-cellular state numbers of cytotoxic T cells (panel A and B) and of antigen presenting cells DC and M (respectively in panels C and D). Further details in the text.
